# Supplementary material
Source: Springer Nature journal article supplement (https://www.springermedizin.de/resource/supplementary/12911_2006_165_MOESM2_ESM.pdf/9527276)

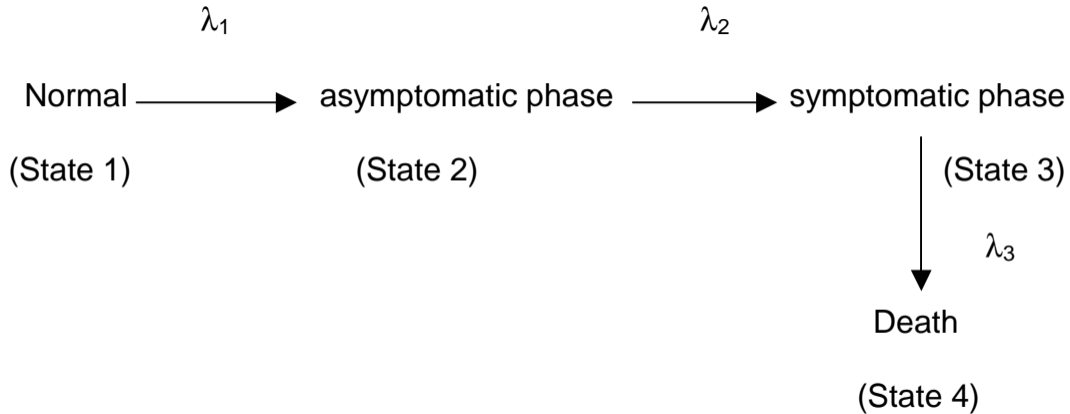

Supplement: MOESM2 [file 9527276]
